# Supplementary material for: Catalytic and mechanistic studies into the epoxidation of styrenes using manganese complexes of structurally similar polyamine ligands
Source: Royal Society of Chemistry journal article supplement (doi:10.1039/c3ob42274g), 2013-12-18
Supplement: c3ob42274g.pdf [file c3ob42274g.pdf]

## Catalytic and mechanistic studies into the epoxidation of styrenes using manganese complexes of structurally similar polyamine ligands.

Gennadiy Ilyashenko, Giorgio De Faveri, Thomas Follier, Rawan Al-Safadi, Majid Motevalli and Michael Watkinson\*

The Joseph Priestley Building, School of Biological and Chemical Sciences, Queen Mary University of London, Mile End Road, London, E1 4NS, UK.

Email m.watkinson@qmul.ac.uk

### Calibrations

The calibration procedure used allows for the simultaneous calibration of substrate and product, thus reducing error. Standard solutions of styrene (0.50 M) in MeCN, styrene oxide (0.50 M) in MeCN and anisole (0.10 M) in MeCN were prepared. Anisole solution (500  $\mu\text{L}$ ) was then delivered into six volumetric flasks to which solutions of styrene and styrene oxide were added in the following ratios: 1000  $\mu\text{L}$ :0  $\mu\text{L}$ ; 800  $\mu\text{L}$ :200  $\mu\text{L}$ ; 600  $\mu\text{L}$ :400  $\mu\text{L}$ ; 400  $\mu\text{L}$ :600  $\mu\text{L}$ ; 200  $\mu\text{L}$ :800  $\mu\text{L}$ ; 0  $\mu\text{L}$ :1000  $\mu\text{L}$ . The solutions were then diluted with MeCN to give an overall volume of 5.0 mL. Each solution (100  $\mu\text{L}$ ) was then transferred into a HPLC sample vial and diluted with THF (1.0 mL) and analysed by HPLC to obtain standard calibration plots (**Figure ES1**). **Note** that 1,2-dichlorobenzene DCB was used for the calibration of 4-nitrilestyrene. Table 1 listing HPLC conditions and retention times for each styrene substrate is given below.

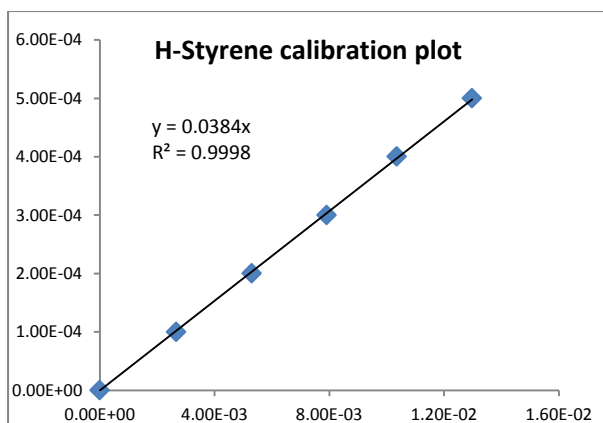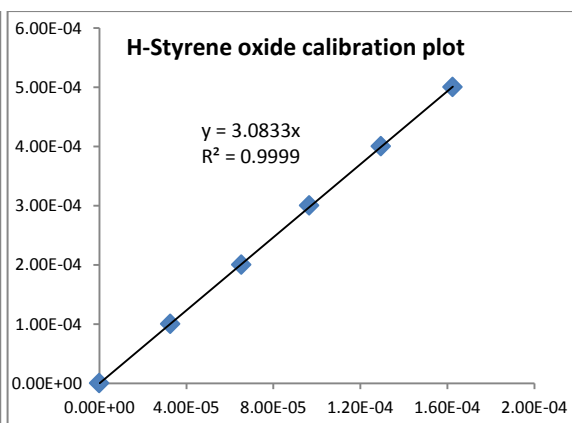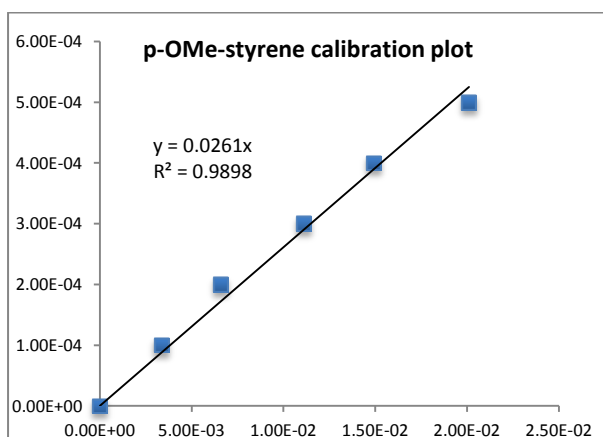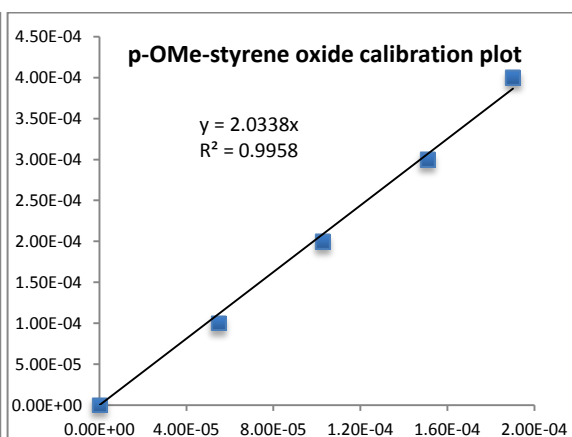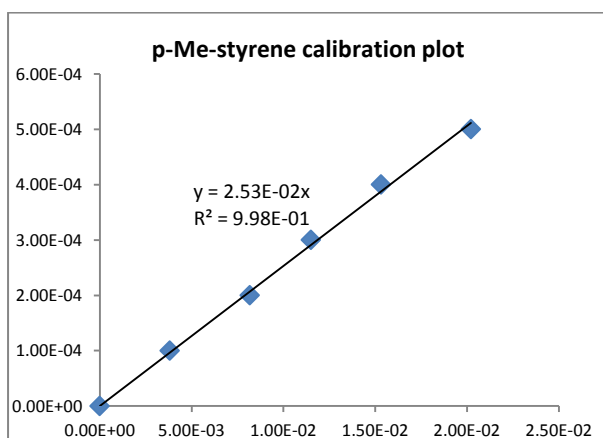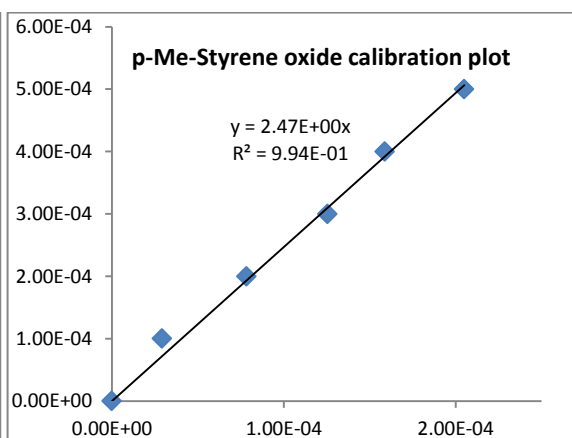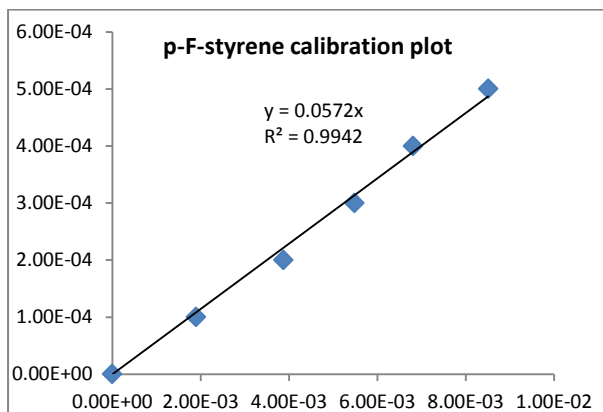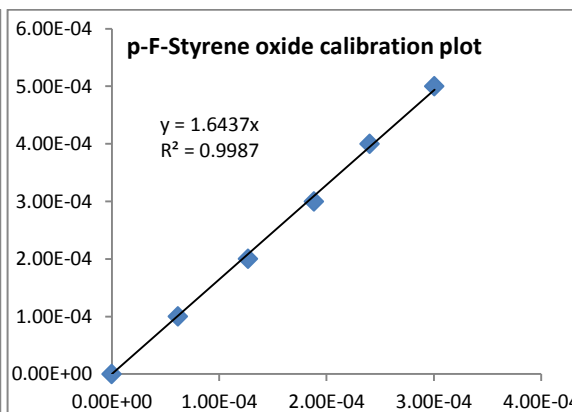

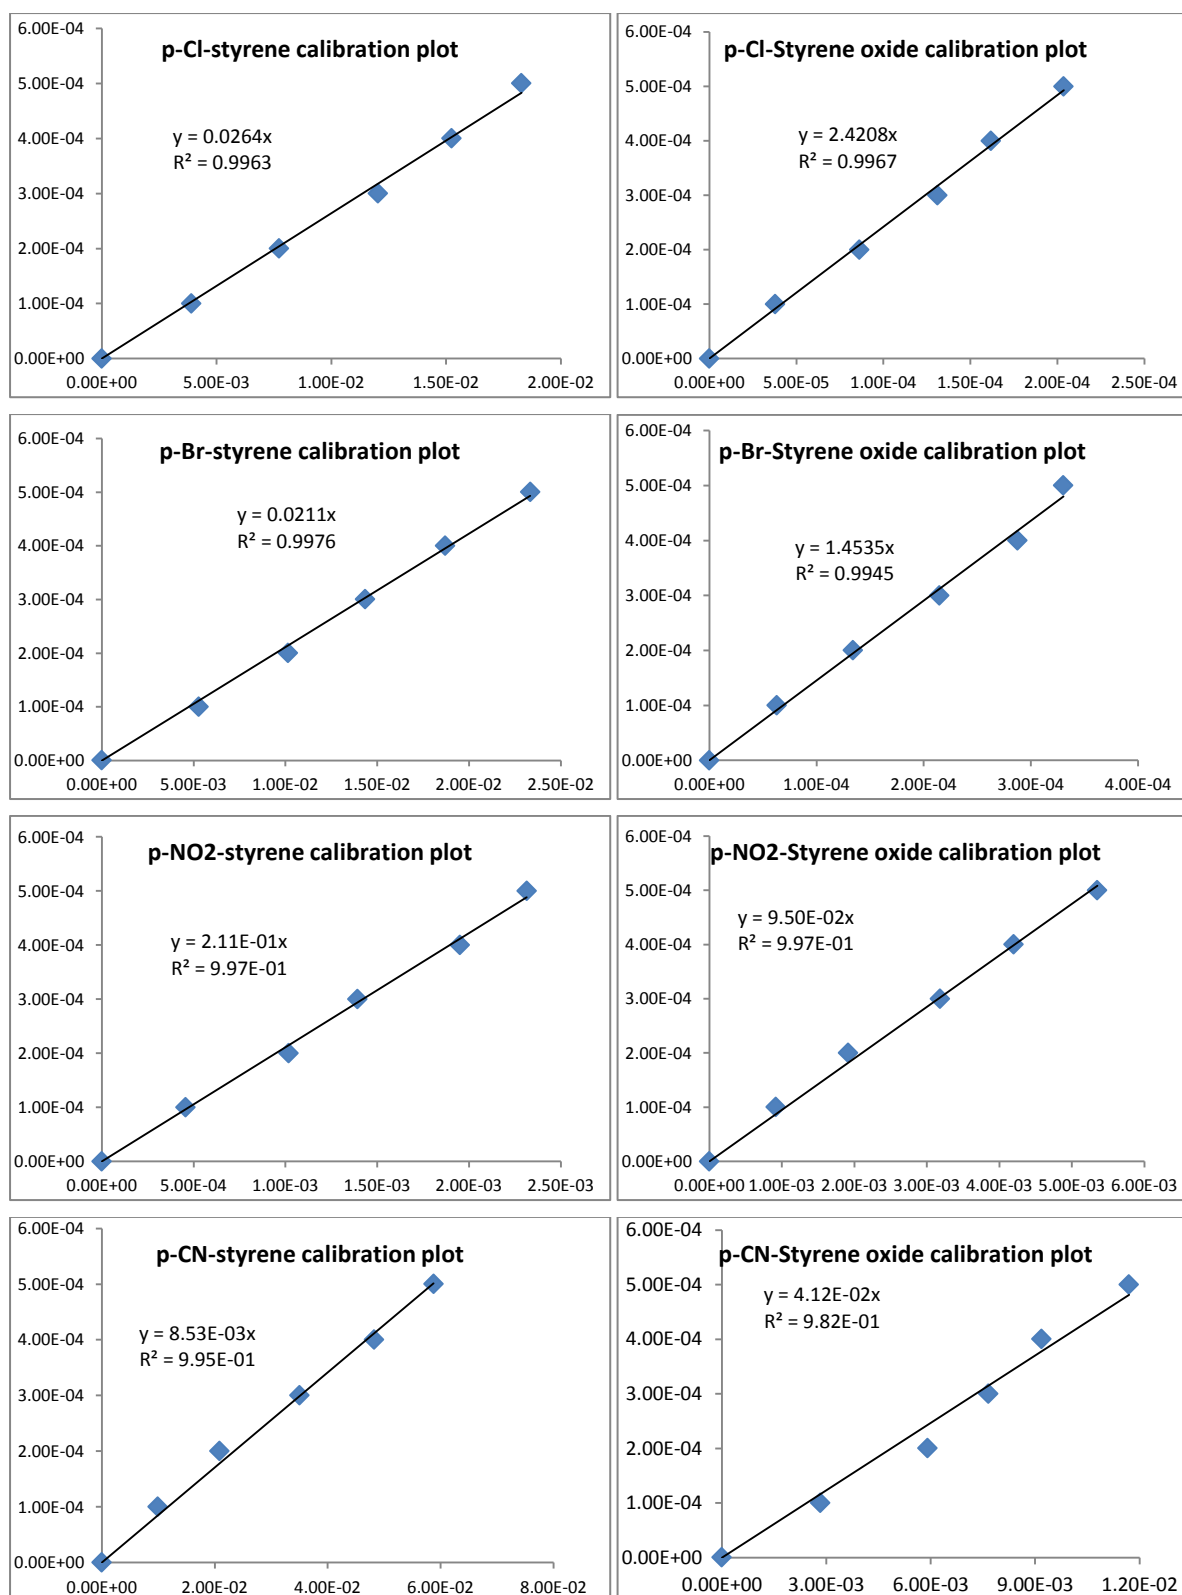

**Figure ES1** Calibration graphs for all styrenes and corresponding epoxides used in this study: y axis is the number of moles of styrene/epoxide expected, x axis is the number of moles of styrene/epoxide observed. The slope is correction factor. Note that DCB was used for the *p*-CN-styrene calibration.

| Entry | Styrene               | HPLC conditions: Reverse phase Eclipse C18                                                                                                                                                                                                                                                                                                                                                                            |
|-------|-----------------------|-----------------------------------------------------------------------------------------------------------------------------------------------------------------------------------------------------------------------------------------------------------------------------------------------------------------------------------------------------------------------------------------------------------------------|
| 1     | H-Styrene             | Flow: 1 mL min <sup>-1</sup> ; Solvent: H <sub>2</sub> O (30%) MeOH (70%); λ = 252 nm; R <sub>t(styrene)</sub> = 5.88 min, R <sub>t(anisole)</sub> = 3.54 min, R <sub>t(styrene epoxide)</sub> = 2.83 min.                                                                                                                                                                                                            |
| 2     | <i>p</i> -OMe-styrene | Flow: 1 mL min <sup>-1</sup> ; Solvent: H <sub>2</sub> O (35%) MeOH (65%); λ = 252 nm; R <sub>t(4-methoxystyrene)</sub> = 9.26 min, R <sub>t(anisole)</sub> = 5.31 min, R <sub>t(4-methoxystyrene epoxide)</sub> = 3.28 min.                                                                                                                                                                                          |
| 3     | <i>p</i> -Me-styrene  | Flow: 0.80 mL min <sup>-1</sup> ; Solvent: H <sub>2</sub> O (40%) MeOH (60%) over 10 min to H <sub>2</sub> O (30%) MeOH (70%) with curve 2, then over 3 min to H <sub>2</sub> O (40%) MeOH (60%) with curve 2, then over 5 min to H <sub>2</sub> O (40%) MeOH (60%); λ = 252 nm; R <sub>t(4-methylstyrene)</sub> = 23.42 min, R <sub>t(anisole)</sub> = 7.39 min, R <sub>t(4-methylstyrene epoxide)</sub> = 6.64 min. |
| 4     | <i>p</i> -F-styrene   | Flow: 1 mL min <sup>-1</sup> ; Solvent: H <sub>2</sub> O (30%) MeOH (70%); λ = 252 nm; R <sub>t(4-fluorostyrene)</sub> = 10.98 min, R <sub>t(anisole)</sub> = 5.27 min, R <sub>t(4-fluorostyrene epoxide)</sub> = 4.10 min.                                                                                                                                                                                           |
| 5     | <i>p</i> -Cl-styrene  | Flow: 1 mL min <sup>-1</sup> ; Solvent: H <sub>2</sub> O (40%) MeOH (60%) over 20 min to H <sub>2</sub> O (10%) MeOH (90%) with curve 2, then over 5 min to H <sub>2</sub> O (40%) MeOH (60%) with curve 1, then over 5 min to H <sub>2</sub> O (40%) MeOH (60%); λ = 252 nm; R <sub>t(4-chlorostyrene)</sub> = 15.44 min, R <sub>t(anisole)</sub> = 6.54 min, R <sub>t(4-chlorostyrene epoxide)</sub> = 5.28 min.    |
| 6     | <i>p</i> -Br-styrene  | Flow: 1 mL min <sup>-1</sup> ; Solvent: H <sub>2</sub> O (40%) MeOH (60%) over 20 min to H <sub>2</sub> O (10%) MeOH (90%) with curve 2, then over 5 min to H <sub>2</sub> O (40%) MeOH (60%) with curve 1, then over 5 min to H <sub>2</sub> O (40%) MeOH (60%); λ = 252 nm; R <sub>t(4-bromostyrene)</sub> = 16.78 min, R <sub>t(anisole)</sub> = 7.55 min, R <sub>t(4-bromostyrene epoxide)</sub> = 5.31 min.      |

|          |                                    |                                                                                                                                                                                                                                                                                                                                                                                              |
|----------|------------------------------------|----------------------------------------------------------------------------------------------------------------------------------------------------------------------------------------------------------------------------------------------------------------------------------------------------------------------------------------------------------------------------------------------|
| <b>7</b> | <i>p</i> -NO <sub>2</sub> -styrene | Flow: 0.80 mL min <sup>-1</sup> ; Solvent: H <sub>2</sub> O (40%) MeOH (60%); λ = 252 nm;<br>R <sub>t(4-nitrostyrene)</sub> = 8.99 min, R <sub>t(anisole)</sub> = 6.68 min, R <sub>t(4-nitrostyrene epoxide)</sub> = 4.43 min.                                                                                                                                                               |
| <b>8</b> | <i>p</i> -CN-styrene               | Flow: 0.70 mL min <sup>-1</sup> ; Solvent: H <sub>2</sub> O (65%) MeOH (35%) over 5 min with curve 1, then over 15 min to H <sub>2</sub> O (25%) MeOH (75%) with curve 2, then over 5 min to H <sub>2</sub> O (50%) MeOH (50%) with curve 1; λ = 252 nm; R <sub>t(4-nitrilestyrene)</sub> = 20.12 min, R <sub>t(DCB)</sub> = 25.06 min, R <sub>t(4-nitrilestyrene epoxide)</sub> = 4.87 min. |

**Table ES1.** HPLC conditions used for monitoring progress of the epoxidation reactions.
